# Supplementary material
Source: ML conference proceedings conference paper supplement (https://proceedings.neurips.cc/paper_files/paper/2021/hash/d5397f1497b5cdaad7253fdc92db610b-Abstract.html)
Supplement: Supplementary file 1 [file d5397f1497b5cdaad7253fdc92db610b-Supplemental.pdf]

## A Appendix

Throughout the convergence analysis in this paper, we use  $\bar{a}_t = \frac{1}{K} \sum_{k=1}^K a_t^{(k)}$  to denote the average variables across different devices and introduces two auxiliary matrices  $A_t = [a_t^{(1)}, a_t^{(2)}, \dots, a_t^{(K)}]$  and  $\bar{A}_t = [\bar{a}_t, \bar{a}_t, \dots, \bar{a}_t]$ , where  $a_t^{(k)} \in \{x_t^{(k)}, \tilde{x}_t^{(k)}, z_t^{(k)}, v_t^{(k)}, u_t^{(k)}, s_t^{(k)}, h_t^{(k)}, d_t^{(k)}\}$ .

### A.1 Convergence Analysis of Algorithm 1

**Lemma 1.** *In terms of Assumptions 2-4, by setting  $\beta_t \leq \frac{1}{2\eta L_F}$ , the following inequality holds.*

$$\begin{aligned} \mathbb{E}[F(\bar{x}_{t+1})] &\leq \mathbb{E}[F(\bar{x}_t)] - \frac{\beta_t}{2} \mathbb{E}[\|\nabla F(\bar{x}_t)\|^2] - \frac{\eta\beta_t}{4} \mathbb{E}[\|\bar{z}_t\|^2] + \frac{\beta_t L_F^2}{K} \sum_{k=1}^K \mathbb{E}[\|x_t^{(k)} - \bar{x}_t\|^2] \\ &+ \frac{3}{K} \sum_{k=1}^K \frac{\beta_t C_g^2 \sigma_f^2}{|\mathcal{A}_t^{(k)}|} + \frac{3\beta_t C_g^2 L_f^2}{K} \sum_{k=1}^K \mathbb{E}[\|u_t^{(k)} - g^{(k)}(x_t^{(k)})\|^2] + \frac{3}{K} \sum_{k=1}^K \frac{\beta_t C_f^2 \sigma_{g'}^2}{|\mathcal{B}_t^{(k)}|}. \end{aligned} \quad (26)$$

*Proof.* In terms of the smoothness of  $F(x)$ , we can get

$$\begin{aligned} F(\bar{x}_{t+1}) &\leq F(\bar{x}_t) + \langle \nabla F(\bar{x}_t), \bar{x}_{t+1} - \bar{x}_t \rangle + \frac{L_F}{2} \|\bar{x}_{t+1} - \bar{x}_t\|^2 \\ &= F(\bar{x}_t) + \beta_t \langle \nabla F(\bar{x}_t), \bar{x}_{t+1} - \bar{x}_t \rangle + \frac{\beta_t^2 L_F}{2} \|\bar{x}_{t+1} - \bar{x}_t\|^2 \\ &= F(\bar{x}_t) - \eta\beta_t \langle \nabla F(\bar{x}_t), \bar{z}_t \rangle + \frac{\eta^2 \beta_t^2 L_F}{2} \|\bar{z}_t\|^2 \\ &= F(\bar{x}_t) - \frac{\eta\beta_t}{2} \|\nabla F(\bar{x}_t)\|^2 - \left( \frac{\eta\beta_t}{2} - \frac{\beta_t^2 \eta^2 L_F}{2} \right) \|\bar{z}_t\|^2 + \frac{\eta\beta_t}{2} \|\bar{z}_t - \nabla F(\bar{x}_t)\|^2 \\ &\leq F(\bar{x}_t) - \frac{\eta\beta_t}{2} \|\nabla F(\bar{x}_t)\|^2 - \frac{\eta\beta_t}{4} \|\bar{z}_t\|^2 + \frac{\eta\beta_t}{2} \|\bar{z}_t - \nabla F(\bar{x}_t)\|^2 \\ &\leq F(\bar{x}_t) - \frac{\eta\beta_t}{2} \|\nabla F(\bar{x}_t)\|^2 - \frac{\eta\beta_t}{4} \|\bar{z}_t\|^2 + \eta\beta_t \|\bar{z}_t\| - \frac{1}{K} \sum_{k=1}^K \nabla g^{(k)}(x_t^{(k)})^T \nabla f^{(k)}(g^{(k)}(x_t^{(k)})) \|^2 \\ &\quad + \eta\beta_t \left\| \frac{1}{K} \sum_{k=1}^K \nabla g^{(k)}(x_t^{(k)})^T \nabla f^{(k)}(g^{(k)}(x_t^{(k)})) - \frac{1}{K} \sum_{k=1}^K \nabla g^{(k)}(\bar{x}_t)^T \nabla f^{(k)}(g^{(k)}(\bar{x}_t)) \right\|^2 \\ &\leq F(\bar{x}_t) - \frac{\eta\beta_t}{2} \|\nabla F(\bar{x}_t)\|^2 - \frac{\eta\beta_t}{4} \|\bar{z}_t\|^2 + \eta\beta_t \|\bar{z}_t\| - \frac{1}{K} \sum_{k=1}^K \nabla g^{(k)}(x_t^{(k)})^T \nabla f^{(k)}(g^{(k)}(x_t^{(k)})) \|^2 \\ &\quad + \frac{\eta\beta_t L_F^2}{K} \sum_{k=1}^K \|x_t^{(k)} - \bar{x}_t\|^2, \\ &\leq F(\bar{x}_t) - \frac{\eta\beta_t}{2} \|\nabla F(\bar{x}_t)\|^2 - \frac{\eta\beta_t}{4} \|\bar{z}_t\|^2 + \frac{\eta\beta_t L_F^2}{K} \sum_{k=1}^K \|x_t^{(k)} - \bar{x}_t\|^2 \\ &\quad + \frac{3}{K} \sum_{k=1}^K \frac{\eta\beta_t C_g^2 \sigma_f^2}{|\mathcal{A}_t^{(k)}|} + \frac{3\eta\beta_t C_g^2 L_f^2}{K} \sum_{k=1}^K \|u_t^{(k)} - g^{(k)}(x_t^{(k)})\|^2 + \frac{3}{K} \sum_{k=1}^K \frac{\eta\beta_t C_f^2 \sigma_{g'}^2}{|\mathcal{B}_t^{(k)}|}, \end{aligned} \quad (27)$$

where the first inequality holds due to  $\beta_t \leq \frac{1}{2\eta L_F}$ , the last inequality holds due to Lemma 2.  $\square$

**Lemma 2.** *In terms of Assumptions 2-4, the following inequality holds.*

$$\begin{aligned} &\mathbb{E}[\|\bar{z}_t - \frac{1}{K} \sum_{k=1}^K \nabla g^{(k)}(x_t^{(k)})^T \nabla f^{(k)}(g^{(k)}(x_t^{(k)}))\|^2] \\ &\leq \frac{3}{K} \sum_{k=1}^K \frac{C_g^2 \sigma_f^2}{|\mathcal{A}_t^{(k)}|} + \frac{3C_g^2 L_f^2}{K} \sum_{k=1}^K \mathbb{E}[\|u_t^{(k)} - g^{(k)}(x_t^{(k)})\|^2] + \frac{3}{K} \sum_{k=1}^K \frac{C_f^2 \sigma_{g'}^2}{|\mathcal{B}_t^{(k)}|}. \end{aligned} \quad (28)$$

*Proof.* In terms of the definition of  $\bar{z}_t$ , we can get

$$\begin{aligned}
& \mathbb{E}[\|\bar{z}_t - \frac{1}{K} \sum_{k=1}^K \nabla g^{(k)}(x_t^{(k)})^T \nabla f^{(k)}(g^{(k)}(x_t^{(k)}))\|^2] \\
&= \mathbb{E}[\|\frac{1}{K} \sum_{k=1}^K (v_t^{(k)})^T \nabla f^{(k)}(u_t^{(k)}; \mathcal{A}_t^{(k)}) - \frac{1}{K} \sum_{k=1}^K \nabla g^{(k)}(x_t^{(k)})^T \nabla f^{(k)}(g^{(k)}(x_t^{(k)}))\|^2] \\
&\leq \frac{1}{K} \sum_{k=1}^K \mathbb{E}[\|(v_t^{(k)})^T \nabla f^{(k)}(u_t^{(k)}; \mathcal{A}_t^{(k)}) - \nabla g^{(k)}(x_t^{(k)})^T \nabla f^{(k)}(g^{(k)}(x_t^{(k)}))\|^2] \\
&= \frac{1}{K} \sum_{k=1}^K \mathbb{E}[\|(v_t^{(k)})^T \nabla f^{(k)}(u_t^{(k)}; \mathcal{A}_t^{(k)}) - (v_t^{(k)})^T \nabla f^{(k)}(u_t^{(k)}) + (v_t^{(k)})^T \nabla f^{(k)}(u_t^{(k)}) \\
&\quad - (v_t^{(k)})^T \nabla f^{(k)}(g^{(k)}(x_t^{(k)})) + (v_t^{(k)})^T \nabla f^{(k)}(g^{(k)}(x_t^{(k)})) - \nabla g^{(k)}(x_t^{(k)})^T \nabla f^{(k)}(g^{(k)}(x_t^{(k)}))\|^2] \\
&\leq \frac{3}{K} \sum_{k=1}^K \mathbb{E}[\|v_t^{(k)}\|^2 \|\nabla f^{(k)}(u_t^{(k)}; \mathcal{A}_t^{(k)}) - \nabla f^{(k)}(u_t^{(k)})\|^2 + \|v_t^{(k)}\|^2 \|\nabla f^{(k)}(u_t^{(k)}) - \nabla f^{(k)}(g^{(k)}(x_t^{(k)}))\|^2 \\
&\quad + \|\nabla f^{(k)}(g^{(k)}(x_t^{(k)}))\|^2 \|v_t^{(k)} - \nabla g^{(k)}(x_t^{(k)})\|^2] \\
&\leq \frac{3}{K} \sum_{k=1}^K \frac{C_g^2 \sigma_f^2}{|\mathcal{A}_t^{(k)}|} + \frac{3C_g^2 L_f^2}{K} \sum_{k=1}^K \mathbb{E}[\|u_t^{(k)} - g^{(k)}(x_t^{(k)})\|^2] + \frac{3}{K} \sum_{k=1}^K \frac{C_f^2 \sigma_{g'}^2}{|\mathcal{B}_t^{(k)}|}, \tag{29}
\end{aligned}$$

where the last inequality holds due to Assumptions 2-4.  $\square$

**Lemma 3.** In terms of Assumptions 2-4, by setting  $0 < \beta_t \leq \frac{1}{8\gamma}$ , for  $t > 0$ , the following inequality holds.

$$\begin{aligned}
& \mathbb{E}[\|u_t^{(k)} - g^{(k)}(x_t^{(k)})\|^2] \\
&\leq (1 - \gamma\beta_{t-1}) \mathbb{E}[\|u_{t-1}^{(k)} - g^{(k)}(x_{t-1}^{(k)})\|^2] + \frac{9\beta_{t-1}C_g^2}{8\gamma} \mathbb{E}[\|\tilde{x}_t^{(k)} - x_{t-1}^{(k)}\|^2] + \frac{\beta_{t-1}^2 \gamma^2 \sigma_g^2}{|\mathcal{B}_t^{(k)}|}. \tag{30}
\end{aligned}$$

*Proof.* In terms of the definition of  $u_t^{(k)}$ , for  $t > 0$ , we can get

$$\begin{aligned}
& \mathbb{E}[\|u_t^{(k)} - g^{(k)}(x_t^{(k)})\|^2] \\
&= \mathbb{E}[\|(1 - \gamma\beta_{t-1})u_{t-1}^{(k)} + \gamma\beta_{t-1}g^{(k)}(x_t^{(k)}; \mathcal{B}_t^{(k)}) - g^{(k)}(x_t^{(k)})\|^2] \\
&= \mathbb{E}[\|(1 - \gamma\beta_{t-1})(u_{t-1}^{(k)} - g^{(k)}(x_t^{(k)})) + \gamma\beta_{t-1}(g^{(k)}(x_t^{(k)}; \mathcal{B}_t^{(k)}) - g^{(k)}(x_t^{(k)}))\|^2] \\
&\leq (1 - \gamma\beta_{t-1})^2 \mathbb{E}[\|u_{t-1}^{(k)} - g^{(k)}(x_t^{(k)})\|^2] + \frac{\beta_{t-1}^2 \gamma^2 \sigma_g^2}{|\mathcal{B}_t^{(k)}|}, \tag{31}
\end{aligned}$$

where the last inequality holds due to Assumption 4. Additionally, we can get

$$\begin{aligned}
& (1 - \gamma\beta_{t-1})^2 \mathbb{E}[\|u_{t-1}^{(k)} - g^{(k)}(x_t^{(k)})\|^2] \\
&= (1 - \gamma\beta_{t-1})^2 \mathbb{E}[\|u_{t-1}^{(k)} - g^{(k)}(x_{t-1}^{(k)}) + g^{(k)}(x_{t-1}^{(k)}) - g^{(k)}(x_t^{(k)})\|^2] \\
&\leq (1 - \gamma\beta_{t-1})^2 (1 + \gamma\beta_{t-1}) \mathbb{E}[\|u_{t-1}^{(k)} - g^{(k)}(x_{t-1}^{(k)})\|^2] \\
&\quad + (1 - \gamma\beta_{t-1})^2 (1 + \frac{1}{\gamma\beta_{t-1}}) \mathbb{E}[\|g^{(k)}(x_{t-1}^{(k)}) - g^{(k)}(x_t^{(k)})\|^2] \\
&\leq (1 - \gamma\beta_{t-1}) \mathbb{E}[\|u_{t-1}^{(k)} - g^{(k)}(x_{t-1}^{(k)})\|^2] + \frac{9}{8\gamma\beta_{t-1}} \mathbb{E}[\|g^{(k)}(x_{t-1}^{(k)}) - g^{(k)}(x_t^{(k)})\|^2] \\
&\leq (1 - \gamma\beta_{t-1}) \mathbb{E}[\|u_{t-1}^{(k)} - g^{(k)}(x_{t-1}^{(k)})\|^2] + \frac{9C_g^2}{8\gamma\beta_{t-1}} \mathbb{E}[\|x_t^{(k)} - x_{t-1}^{(k)}\|^2] \\
&= (1 - \gamma\beta_{t-1}) \mathbb{E}[\|u_{t-1}^{(k)} - g^{(k)}(x_{t-1}^{(k)})\|^2] + \frac{9\beta_{t-1}C_g^2}{8\gamma} \mathbb{E}[\|\tilde{x}_t^{(k)} - x_{t-1}^{(k)}\|^2], \tag{32}
\end{aligned}$$

where the third step holds due to  $0 < \beta_{t-1} \leq \frac{1}{8\gamma}$ , the fourth step holds due to Assumption 3. In the last step,  $\beta_{t-1}$  (where  $\beta_{t-1} < 1$ ) is moved to the nominator, which could control the variance tightly. That is the reason why we use Line 11 in Algorithm 1. Then, by combining above two inequalities, we complete the proof.  $\square$

**Lemma 4.** *In terms of Assumptions 1-4, the following inequality holds.*

$$\begin{aligned} \sum_{k=1}^K \|u_{t+1}^{(k)} - \bar{u}_{t+1}\|^2 &\leq (1 - \gamma\beta_t) \sum_{k=1}^K \|u_t^{(k)} - \bar{u}_t\|^2 + \frac{6K\gamma\beta_t\sigma_g^2}{|\mathcal{B}_{t+1}^{(k)}|} + 12\gamma\beta_t C_g^2 \sum_{k=1}^K \|x_{t+1}^{(k)} - \bar{x}_{t+1}\|^2, \\ \sum_{k=1}^K \|u_0^{(k)} - \bar{u}_0\|^2 &\leq \frac{6K\sigma^2}{|\mathcal{B}_0^{(k)}|}. \end{aligned} \quad (33)$$

*Proof.* In terms of the definition of  $u_{t+1}^{(k)}$ , we have

$$\begin{aligned} &\sum_{k=1}^K \|u_{t+1}^{(k)} - \bar{u}_{t+1}\|^2 \\ &= \|U_{t+1} - \bar{U}_{t+1}\|_F^2 \\ &= \|(1 - \gamma\beta_t)U_t + \gamma\beta_t G_{t+1} - (1 - \gamma\beta_t)\bar{U}_t - \gamma\beta_t \bar{G}_{t+1}\|_F^2 \\ &\leq (1 + a)(1 - \gamma\beta_t)^2 \|U_t - \bar{U}_t\|_F^2 + (1 + \frac{1}{a})\gamma^2 \beta_t^2 \|G_{t+1} - \bar{G}_{t+1}\|_F^2 \\ &= (1 - \gamma\beta_t)\|U_t - \bar{U}_t\|_F^2 + \gamma\beta_t\|G_{t+1} - \bar{G}_{t+1}\|_F^2 \\ &= (1 - \gamma\beta_t) \sum_{k=1}^K \|u_t^{(k)} - \bar{u}_t\|^2 + \gamma\beta_t \sum_{k=1}^K \|g^{(k)}(x_{t+1}^{(k)}; \mathcal{B}_{t+1}^{(k)}) - \frac{1}{K} \sum_{k'=1}^K g^{(k')}(x_{t+1}^{(k')}; \mathcal{B}_{t+1}^{(k')})\|^2, \end{aligned} \quad (34)$$

where  $G_t = [g^{(1)}(x_t^{(1)}; \mathcal{B}_t^{(1)}), g^{(2)}(x_t^{(2)}; \mathcal{B}_t^{(2)}), \dots, g^{(K)}(x_t^{(K)}; \mathcal{B}_t^{(K)})]$ ,  $\bar{G}_t = G_t \mathbf{1}\mathbf{1}^T / K$ , the fourth step holds due to  $a = \frac{\gamma\beta_t}{1 - \gamma\beta_t}$ . In the following, we will bound the last term.

$$\begin{aligned} &\sum_{k=1}^K \|g^{(k)}(x_{t+1}^{(k)}; \mathcal{B}_{t+1}^{(k)}) - \frac{1}{K} \sum_{k'=1}^K g^{(k')}(x_{t+1}^{(k')}; \mathcal{B}_{t+1}^{(k')})\|^2 \\ &= \sum_{k=1}^K \|g^{(k)}(x_{t+1}^{(k)}; \mathcal{B}_{t+1}^{(k)}) - g^{(k)}(x_{t+1}^{(k)}; \mathcal{B}_{t+1}^{(k)}) + g^{(k)}(x_{t+1}^{(k)}; \mathcal{B}_{t+1}^{(k)}) - \frac{1}{K} \sum_{k'=1}^K g^{(k')}(x_{t+1}^{(k')}; \mathcal{B}_{t+1}^{(k')})\|^2 \\ &\quad + \frac{1}{K} \sum_{k'=1}^K \|g^{(k')}(x_{t+1}^{(k')}; \mathcal{B}_{t+1}^{(k')}) - \frac{1}{K} \sum_{k'=1}^K g^{(k')}(x_{t+1}^{(k')}; \mathcal{B}_{t+1}^{(k')})\|^2 \\ &\leq 3 \sum_{k=1}^K \left( \|g^{(k)}(x_{t+1}^{(k)}; \mathcal{B}_{t+1}^{(k)}) - g^{(k)}(x_{t+1}^{(k)}; \mathcal{B}_{t+1}^{(k)})\|^2 + \|g^{(k)}(x_{t+1}^{(k)}; \mathcal{B}_{t+1}^{(k)}) - \frac{1}{K} \sum_{k'=1}^K g^{(k')}(x_{t+1}^{(k')}; \mathcal{B}_{t+1}^{(k')})\|^2 \right) \\ &\quad + \left\| \frac{1}{K} \sum_{k'=1}^K g^{(k')}(x_{t+1}^{(k')}; \mathcal{B}_{t+1}^{(k')}) - \frac{1}{K} \sum_{k'=1}^K g^{(k')}(x_{t+1}^{(k')}; \mathcal{B}_{t+1}^{(k')}) \right\|^2 \\ &\leq 3 \sum_{k=1}^K \left( \frac{2\sigma_g^2}{|\mathcal{B}_{t+1}^{(k)}|} + \|g^{(k)}(x_{t+1}^{(k)}; \mathcal{B}_{t+1}^{(k)}) - \frac{1}{K} \sum_{k'=1}^K g^{(k')}(x_{t+1}^{(k')}; \mathcal{B}_{t+1}^{(k')})\|^2 \right) \\ &\leq \frac{6K\sigma_g^2}{|\mathcal{B}_{t+1}^{(k)}|} + 12C_g^2 \sum_{k=1}^K \|x_{t+1}^{(k)} - \bar{x}_{t+1}\|^2, \end{aligned} \quad (35)$$

where the last step holds due to the following inequality.

$$\begin{aligned} &\sum_{k=1}^K \|g^{(k)}(x_{t+1}^{(k)}; \mathcal{B}_{t+1}^{(k)}) - \frac{1}{K} \sum_{k'=1}^K g^{(k')}(x_{t+1}^{(k')}; \mathcal{B}_{t+1}^{(k')})\|^2 \\ &= \sum_{k=1}^K \|g^{(k)}(x_{t+1}^{(k)}; \mathcal{B}_{t+1}^{(k)}) - g^{(k)}(\bar{x}_{t+1}; \mathcal{B}_{t+1}^{(k)}) + g^{(k)}(\bar{x}_{t+1}; \mathcal{B}_{t+1}^{(k)}) - \frac{1}{K} \sum_{k'=1}^K g^{(k')}(x_{t+1}^{(k')}; \mathcal{B}_{t+1}^{(k')})\|^2 \\ &\leq 2 \sum_{k=1}^K \left( \|g^{(k)}(x_{t+1}^{(k)}; \mathcal{B}_{t+1}^{(k)}) - g^{(k)}(\bar{x}_{t+1}; \mathcal{B}_{t+1}^{(k)})\|^2 + \left\| \frac{1}{K} \sum_{k'=1}^K g^{(k')}(x_{t+1}^{(k')}; \mathcal{B}_{t+1}^{(k')}) - \frac{1}{K} \sum_{k'=1}^K g^{(k')}(x_{t+1}^{(k')}; \mathcal{B}_{t+1}^{(k')}) \right\|^2 \right) \\ &\leq 2 \sum_{k=1}^K \left( C_g^2 \|x_{t+1}^{(k)} - \bar{x}_{t+1}\|^2 + \frac{1}{K} \sum_{k'=1}^K C_g^2 \|\bar{x}_{t+1} - x_{t+1}^{(k')}\|^2 \right) \\ &= 4C_g^2 \sum_{k=1}^K \|x_{t+1}^{(k)} - \bar{x}_{t+1}\|^2. \end{aligned} \quad (36)$$

By combining Eq. (34) and Eq. (35), the proof for the first part is completed.

When  $t = 0$ , we can get

$$\sum_{k=1}^K \|u_0^{(k)} - \bar{u}_0\|^2 = \sum_{k=1}^K \|g^{(k)}(x_0^{(k)}; \mathcal{B}_0^{(k)}) - \frac{1}{K} \sum_{k'=1}^K g^{(k')}(x_0^{(k')}; \mathcal{B}_0^{(k')})\|^2 \leq \frac{6K\sigma^2}{|\mathcal{B}_0^{(k)}|}, \quad (37)$$

which completes the proof.  $\square$

**Lemma 5.** *In terms of Assumptions 2-4, the following inequality holds.*

$$\begin{aligned} \sum_{k=1}^K \|z_{t+1}^{(k)} - \bar{z}_{t+1}\|^2 &\leq 48C_f^2L_g^2 \sum_{k=1}^K \|x_{t+1}^{(k)} - \bar{x}_{t+1}\|^2 + 16 \sum_{k=1}^K C_g^2L_f^2 \|u_{t+1}^{(k)} - \bar{u}_{t+1}\|^2 \\ &\quad + \frac{24KC_f^2\sigma_{g'}^2}{|\mathcal{B}_{t+1}^{(k)}|} + \frac{8KC_g^2\sigma_f^2}{|\mathcal{A}_{t+1}^{(k)}|}, \\ \sum_{k=1}^K \|z_0^{(k)} - \bar{z}_0\|^2 &\leq \frac{24KC_f^2\sigma_{g'}^2}{|\mathcal{B}_0^{(k)}|} + \frac{8KC_g^2\sigma_f^2}{|\mathcal{A}_0^{(k)}|} + \frac{96KC_g^2L_f^2\sigma^2}{|\mathcal{B}_0^{(k)}|}. \end{aligned} \quad (38)$$

*Proof.* In terms of the definition of  $z_t^{(k)}$ , we can get

$$\begin{aligned} &\sum_{k=1}^K \|z_{t+1}^{(k)} - \bar{z}_{t+1}\|^2 \\ &= \sum_{k=1}^K \|(v_{t+1}^{(k)})^T \nabla f^{(k)}(u_{t+1}^{(k)}; \mathcal{A}_{t+1}^{(k)}) - \frac{1}{K} \sum_{k'=1}^K (v_{t+1}^{(k')})^T \nabla f^{(k')}(u_{t+1}^{(k')}; \mathcal{A}_{t+1}^{(k')})\|^2 \\ &= \sum_{k=1}^K \|(v_{t+1}^{(k)})^T \nabla f^{(k)}(u_{t+1}^{(k)}; \mathcal{A}_{t+1}^{(k)}) - \frac{1}{K} \sum_{k'=1}^K (v_{t+1}^{(k')})^T \nabla f^{(k)}(u_{t+1}^{(k)}; \mathcal{A}_{t+1}^{(k)}) \\ &\quad + \frac{1}{K} \sum_{k'=1}^K (v_{t+1}^{(k')})^T \nabla f^{(k)}(u_{t+1}^{(k)}; \mathcal{A}_{t+1}^{(k)}) - \frac{1}{K} \sum_{k'=1}^K (v_{t+1}^{(k')})^T \nabla f^{(k)}(u_{t+1}^{(k)}) \\ &\quad + \frac{1}{K} \sum_{k'=1}^K (v_{t+1}^{(k')})^T \nabla f^{(k)}(u_{t+1}^{(k)}) - \frac{1}{K} \sum_{k'=1}^K (v_{t+1}^{(k')})^T \nabla f^{(k')}(u_{t+1}^{(k')}) \\ &\quad + \frac{1}{K} \sum_{k'=1}^K (v_{t+1}^{(k')})^T \nabla f^{(k')}(u_{t+1}^{(k')}) - \frac{1}{K} \sum_{k'=1}^K (v_{t+1}^{(k')})^T \nabla f^{(k')}(u_{t+1}^{(k')}; \mathcal{A}_{t+1}^{(k')})\|^2 \\ &\leq 4 \sum_{k=1}^K C_f^2 \|v_{t+1}^{(k)}\|^2 - \frac{1}{K} \sum_{k'=1}^K \|v_{t+1}^{(k')}\|^2 + \frac{4}{K} \sum_{k=1}^K \sum_{k'=1}^K C_g^2 \|\nabla f^{(k)}(u_{t+1}^{(k)}; \mathcal{A}_{t+1}^{(k)}) - \nabla f^{(k)}(u_{t+1}^{(k)})\|^2 \\ &\quad + \frac{4}{K} \sum_{k=1}^K \sum_{k'=1}^K C_g^2 \|\nabla f^{(k)}(u_{t+1}^{(k)}) - \nabla f^{(k')}(u_{t+1}^{(k')})\|^2 \\ &\quad + \frac{4}{K} \sum_{k=1}^K \sum_{k'=1}^K C_g^2 \|\nabla f^{(k')}(u_{t+1}^{(k')}) - \nabla f^{(k')}(u_{t+1}^{(k')}; \mathcal{A}_{t+1}^{(k')})\|^2 \\ &\leq 4 \sum_{k=1}^K C_f^2 \|v_{t+1}^{(k)}\|^2 - \frac{1}{K} \sum_{k'=1}^K \|v_{t+1}^{(k')}\|^2 + \frac{4KC_g^2\sigma_f^2}{|\mathcal{A}_{t+1}^{(k)}|} + 16 \sum_{k=1}^K C_g^2L_f^2 \|u_{t+1}^{(k)} - \bar{u}_{t+1}\|^2 + \frac{4KC_g^2\sigma_f^2}{|\mathcal{A}_{t+1}^{(k)}|}. \end{aligned} \quad (39)$$

Then, we will bound  $\sum_{k=1}^K \|v_{t+1}^{(k)} - \frac{1}{K} \sum_{k'=1}^K v_{t+1}^{(k')}\|^2$  as follows.

$$\begin{aligned}
& \sum_{k=1}^K \|v_{t+1}^{(k)} - \frac{1}{K} \sum_{k'=1}^K v_{t+1}^{(k')}\|^2 \\
&= \sum_{k=1}^K \|\nabla g^{(k)}(x_{t+1}^{(k)}; \mathcal{B}_{t+1}^{(k)}) - \frac{1}{K} \sum_{k'=1}^K \nabla g^{(k')}(x_{t+1}^{(k')}; \mathcal{B}_{t+1}^{(k')})\|^2 \\
&= \sum_{k=1}^K \|\nabla g^{(k)}(x_{t+1}^{(k)}; \mathcal{B}_{t+1}^{(k)}) - \nabla g^{(k)}(x_{t+1}^{(k)}) + \nabla g^{(k)}(x_{t+1}^{(k)}) \\
&\quad - \frac{1}{K} \sum_{k'=1}^K \nabla g^{(k')}(x_{t+1}^{(k')}) + \frac{1}{K} \sum_{k'=1}^K \nabla g^{(k')}(x_{t+1}^{(k')}) - \frac{1}{K} \sum_{k'=1}^K \nabla g^{(k')}(x_{t+1}^{(k')}; \mathcal{B}_{t+1}^{(k')})\|^2 \\
&\leq 3 \sum_{k=1}^K \left( \|\nabla g^{(k)}(x_{t+1}^{(k)}; \mathcal{B}_{t+1}^{(k)}) - \nabla g^{(k)}(x_{t+1}^{(k)})\|^2 + \|\nabla g^{(k)}(x_{t+1}^{(k)}) - \frac{1}{K} \sum_{k'=1}^K \nabla g^{(k')}(x_{t+1}^{(k')})\|^2 \right. \\
&\quad \left. + \left\| \frac{1}{K} \sum_{k'=1}^K \nabla g^{(k')}(x_{t+1}^{(k')}) - \frac{1}{K} \sum_{k'=1}^K \nabla g^{(k')}(x_{t+1}^{(k')}; \mathcal{B}_{t+1}^{(k')}) \right\|^2 \right) \\
&\leq 3 \sum_{k=1}^K \left( \frac{2\sigma_{g'}^2}{|\mathcal{B}_{t+1}^{(k)}|} + \|\nabla g^{(k)}(x_{t+1}^{(k)}) - \frac{1}{K} \sum_{k'=1}^K \nabla g^{(k')}(x_{t+1}^{(k')})\|^2 \right) \\
&\leq \frac{6K\sigma_{g'}^2}{|\mathcal{B}_{t+1}^{(k)}|} + 12L_g^2 \sum_{k=1}^K \|x_{t+1}^{(k)} - \bar{x}_{t+1}\|^2,
\end{aligned} \tag{40}$$

where the last step holds due to the following inequality.

$$\begin{aligned}
& \sum_{k=1}^K \|\nabla g^{(k)}(x_{t+1}^{(k)}) - \frac{1}{K} \sum_{k'=1}^K \nabla g^{(k')}(x_{t+1}^{(k')})\|^2 \\
&= \sum_{k=1}^K \|\nabla g^{(k)}(x_{t+1}^{(k)}) - \nabla g^{(k)}(\bar{x}_{t+1}) + \nabla g^{(k)}(\bar{x}_{t+1}) - \frac{1}{K} \sum_{k'=1}^K \nabla g^{(k')}(x_{t+1}^{(k')})\|^2 \\
&\leq 2 \sum_{k=1}^K \left( \|\nabla g^{(k)}(x_{t+1}^{(k)}) - \nabla g^{(k)}(\bar{x}_{t+1})\|^2 + \left\| \frac{1}{K} \sum_{k'=1}^K \nabla g^{(k')}(x_{t+1}^{(k')}) - \frac{1}{K} \sum_{k'=1}^K \nabla g^{(k')}(x_{t+1}^{(k')}) \right\|^2 \right) \\
&\leq 2 \sum_{k=1}^K \left( L_g^2 \|x_{t+1}^{(k)} - \bar{x}_{t+1}\|^2 + \frac{1}{K} \sum_{k'=1}^K L_g^2 \|\bar{x}_{t+1} - x_{t+1}^{(k')}\|^2 \right) \\
&= 4L_g^2 \sum_{k=1}^K \|x_{t+1}^{(k)} - \bar{x}_{t+1}\|^2.
\end{aligned} \tag{41}$$

By combining Eq. (39) and Eq. (40), the proof for the first part is completed.

When  $t = 0$ , we can get

$$\begin{aligned}
& \sum_{k=1}^K \|z_0^{(k)} - \bar{z}_0\|^2 \leq 4 \sum_{k=1}^K C_f^2 \|v_0^{(k)} - \frac{1}{K} \sum_{k'=1}^K v_0^{(k')}\|^2 + \frac{8KC_g^2\sigma_f^2}{|\mathcal{A}_0^{(k)}|} + 16 \sum_{k=1}^K C_g^2 L_f^2 \|u_0^{(k)} - \bar{u}_0\|^2 \\
&\leq \frac{24KC_f^2\sigma_{g'}^2}{|\mathcal{B}_0^{(k)}|} + \frac{8KC_g^2\sigma_f^2}{|\mathcal{A}_0^{(k)}|} + \frac{96KC_g^2L_f^2\sigma^2}{|\mathcal{B}_0^{(k)}|}.
\end{aligned} \tag{42}$$

□

**Lemma 6.** *In terms of Assumption 1, the following inequality holds.*

$$\sum_{k=1}^K \|x_{t+1}^{(k)} - \bar{x}_{t+1}\|^2 \leq \left(1 - \beta_t + \frac{\beta_t(1 + \lambda^2)}{2}\right) \sum_{k=1}^K \|x_t^{(k)} - \bar{x}_t\|^2 + \frac{2\beta_t\eta^2}{1 - \lambda^2} \sum_{k=1}^K \|z_t^{(k)} - \bar{z}_t\|^2. \tag{43}$$

*Proof.* In terms of the definition of  $x_{t+1}^{(k)}$ , we have

$$\begin{aligned}
& \sum_{k=1}^K \|x_{t+1}^{(k)} - \bar{x}_{t+1}\|^2 \\
&= \|X_{t+1} - \bar{X}_{t+1}\|_F^2 \\
&= \|(1 - \beta_t)X_t + \beta_t\tilde{X}_{t+1} - (1 - \beta_t)\bar{X}_t - \beta_t\bar{\tilde{X}}_{t+1}\|_F^2 \\
&\leq (1 + a)(1 - \beta_t)^2\|X_t - \bar{X}_t\|_F^2 + (1 + \frac{1}{a})\beta_t^2\|\tilde{X}_{t+1} - \bar{\tilde{X}}_{t+1}\|_F^2 \\
&\leq (1 - \beta_t)\|X_t - \bar{X}_t\|_F^2 + \beta_t\|\tilde{X}_{t+1} - \bar{\tilde{X}}_{t+1}\|_F^2 \\
&= (1 - \beta_t)\|X_t - \bar{X}_t\|_F^2 + \beta_t\|X_tW + \eta Z_t - \bar{X}_t - \eta\bar{Z}_t\|_F^2 \\
&\leq (1 - \beta_t)\|X_t - \bar{X}_t\|_F^2 + (1 + a')\beta_t\|X_tW - \bar{X}_t\|_F^2 + (1 + \frac{1}{a'})\beta_t\eta^2\|Z_t - \bar{Z}_t\|_F^2 \\
&\leq \left(1 - \beta_t + \frac{\beta_t(1 + \lambda^2)}{2}\right) \sum_{k=1}^K \|x_t^{(k)} - \bar{x}_t\|^2 + \frac{2\beta_t\eta^2}{1 - \lambda^2} \sum_{k=1}^K \|z_t^{(k)} - \bar{z}_t\|^2,
\end{aligned} \tag{44}$$

where the second inequality follows from  $a = \frac{\beta_t}{1 - \beta_t}$ , the last inequality follows from  $a' = \frac{1 - \lambda^2}{2\lambda^2}$ .  $\square$

**Lemma 7.** *In terms of Assumption 1, the following inequality holds.*

$$\sum_{k=1}^K \|\tilde{x}_{t+1}^{(k)} - x_t^{(k)}\|^2 \leq 8 \sum_{k=1}^K \|x_t^{(k)} - \bar{x}_t\|^2 + 4\eta^2 \sum_{k=1}^K \|z_t^{(k)} - \bar{z}_t\|^2 + 4\eta^2 K \|\bar{z}_t\|^2 \tag{45}$$

*Proof.* In terms of the definition of  $\tilde{x}_{t+1}^{(k)}$ , we can get

$$\begin{aligned}
& \sum_{k=1}^K \|\tilde{x}_{t+1}^{(k)} - x_t^{(k)}\|^2 \\
&= \|\tilde{X}_{t+1} - X_t\|_F^2 \\
&= \|X_tW - \eta Z_t - X_t\|_F^2 \\
&\leq 2\|X_t(W - I)\|_F^2 + 2\eta^2\|Z_t\|_F^2 \\
&= 2\|(X_t - \bar{X}_t)(W - I)\|_F^2 + 2\eta^2\|Z_t - \bar{Z}_t + \bar{Z}_t\|_F^2 \\
&\leq 2\|X_t - \bar{X}_t\|_F^2 \|W - I\|_2^2 + 2\eta^2\|Z_t - \bar{Z}_t + \bar{Z}_t\|_F^2 \\
&\leq 8\|X_t - \bar{X}_t\|_F^2 + 4\eta^2\|Z_t - \bar{Z}_t\|_F^2 + 4\eta^2\|\bar{Z}_t\|_F^2 \\
&= 8 \sum_{k=1}^K \|x_t^{(k)} - \bar{x}_t\|^2 + 4\eta^2 \sum_{k=1}^K \|z_t^{(k)} - \bar{z}_t\|^2 + 4\eta^2 K \|\bar{z}_t\|^2
\end{aligned} \tag{46}$$

where the second inequality holds due to  $\|AB\|_F \leq \|A\|_2 \|B\|_F$  and the last inequality holds due to  $\|I - W\|_2 \leq 2$ .  $\square$

To prove Theorem 1, we set  $\beta_t = \beta$ ,  $|\mathcal{A}_t^k| = |\mathcal{B}_t^k| = B$ , and introduce a potential function, which is defined as follows:

$$\begin{aligned}
P_t &= \mathbb{E}[F(\bar{x}_t)] + \frac{3\eta C_g^2 L_f^2}{\gamma} \frac{1}{K} \sum_{k=1}^K \mathbb{E}[\|u_t^{(k)} - g^{(k)}(x_t^{(k)})\|^2] + \frac{4\eta}{K} \sum_{k=1}^K \mathbb{E}[\|u_t^{(k)} - \bar{u}_t\|^2] \\
&\quad + \frac{\gamma\eta\beta}{4C_g^2 L_f^2} \frac{1}{K} \sum_{k=1}^K \mathbb{E}[\|z_t^{(k)} - \bar{z}_t\|^2] + \frac{1}{K} \sum_{k=1}^K \mathbb{E}[\|x_t^{(k)} - \bar{x}_t\|^2].
\end{aligned} \tag{47}$$

Then, we are ready to prove Theorem 1.

*Proof.* In terms of Lemmas 1, 3, 4, 5, 6, we can get

$$\begin{aligned}
& P_{t+1} - P_t \\
& \leq -\frac{\eta\beta}{2}\mathbb{E}[\|\nabla F(\bar{x}_t)\|^2] + \left(\frac{27\eta^3\beta C_g^2 L_f^2 C_g^2}{2\gamma^2} - \frac{\eta\beta}{4}\right)\mathbb{E}[\|\bar{z}_t\|^2] \\
& \quad + \frac{\eta\beta(3C_g^2\sigma_f^2 + 3C_f^2\sigma_{g'}^2 + 3/8C_g^2L_f^2\sigma_g^2 + 24\gamma\sigma_g^2)}{B} + \frac{24C_f^2\sigma_{g'}^2 + 8C_g^2\sigma_f^2 + 3C_g^2L_f^2\sigma_g^2}{B} \frac{\gamma\eta\beta}{4C_g^2L_f^2} \\
& \quad + \left(3\eta\beta C_g^2L_f^2 - 3\eta\beta C_g^2L_f^2\right)\frac{1}{K}\sum_{k=1}^K\mathbb{E}[\|u_t^{(k)} - g^{(k)}(x_t^{(k)})\|^2] \\
& \quad + \left(\frac{27\eta\beta C_g^4L_f^2}{\gamma^2} + \eta\beta L_F^2 + \frac{\gamma\eta\beta(48C_f^2L_g^2 + 48\gamma\beta C_g^4L_f^2)}{4C_g^2L_f^2}\left(1 - \beta + \frac{\beta(1 + \lambda^2)}{2}\right)\right) \\
& \quad + \left(-\beta + \frac{\beta(1 + \lambda^2)}{2}\right) + 48\gamma\eta\beta C_g^2\left(1 - \beta + \frac{\beta(1 + \lambda^2)}{2}\right)\frac{1}{K}\sum_{k=1}^K\mathbb{E}[\|x_t^{(k)} - \bar{x}_t\|^2] \\
& \quad + \left(4\gamma\eta\beta(1 - \gamma\beta) - 4\gamma\eta\beta\right)\frac{1}{K}\sum_{k=1}^K\mathbb{E}[\|u_t^{(k)} - \bar{u}_t\|^2] \\
& \quad + \left(\frac{\gamma\eta\beta}{4C_g^2L_f^2}\left((48C_f^2L_g^2 + 48\gamma\beta C_g^4L_f^2)\frac{2\beta\eta^2}{1 - \lambda^2} - 1\right) + \frac{2\beta\eta^2}{1 - \lambda^2} + \frac{96\gamma\eta\beta^2 C_g^2\eta^2}{1 - \lambda^2}\right. \\
& \quad \left. + \frac{9\eta^2\beta C_g^2}{2\gamma}\frac{3\eta C_g^2L_f^2}{\gamma}\right)\frac{1}{K}\sum_{k=1}^K\mathbb{E}[\|z_t^{(k)} - \bar{z}_t\|^2].
\end{aligned} \tag{48}$$

By setting  $\beta \leq \min\{\frac{1}{8\gamma}, \frac{1}{2\eta L_F}, 1\}$ ,  $\gamma > 0$ ,  $\eta \leq \min\{\eta_1, \eta_2, \eta_3\}$  where

$$\begin{aligned}
\eta_1 &= \frac{\gamma}{3\sqrt{6}C_g^2L_f}, \\
\eta_2 &= \frac{1 - \lambda^2}{2} \left/ \left( \frac{27C_g^4L_f^2 + \gamma^2L_F^2}{\gamma^2} + \frac{\gamma(24C_f^2L_g^2 + 99C_g^4L_f^2)}{2C_g^2L_f^2} \right) \right. \\
\eta_3 &= \frac{\sqrt{b^2 + 4ac} - b}{2a}, a = \frac{(24C_f^2L_g^2 + 3C_g^4L_f^2)}{8(1 - \lambda^2)C_g^2L_f^2} + \frac{12C_g^2}{1 - \lambda^2} + \frac{27C_g^4L_f^2}{2\gamma^2}, b = \frac{2}{1 - \lambda^2}, c = \frac{\gamma}{4C_g^2L_f^2},
\end{aligned} \tag{49}$$

we can get

$$\begin{aligned}
P_{t+1} - P_t & \leq -\frac{\eta\beta}{2}\mathbb{E}[\|\nabla F(\bar{x}_t)\|^2] \\
& \quad + \frac{\eta\beta(3C_g^2\sigma_f^2 + 3C_f^2\sigma_{g'}^2 + 3/8C_g^2L_f^2\sigma_g^2 + 24\gamma\sigma_g^2)}{B} + \frac{24C_f^2\sigma_{g'}^2 + 8C_g^2\sigma_f^2 + 3C_g^2L_f^2\sigma_g^2}{B} \frac{\gamma\eta\beta}{4C_g^2L_f^2}.
\end{aligned} \tag{50}$$

By summing over  $t$  from 0 to  $T - 1$ , we can get

$$\begin{aligned}
& \frac{1}{T}\sum_{t=0}^{T-1}\frac{\eta\beta}{2}\mathbb{E}[\|\nabla F(\bar{x}_t)\|^2] \\
& \leq \frac{P_0 - P_T}{T} + \frac{\eta\beta(3C_g^2\sigma_f^2 + 3C_f^2\sigma_{g'}^2 + C_g^2L_f^2\sigma_g^2 + 24\gamma\sigma_g^2)}{B} + \frac{24C_f^2\sigma_{g'}^2 + 8C_g^2\sigma_f^2 + 3C_g^2L_f^2\sigma_g^2}{B} \frac{\gamma\eta\beta}{4C_g^2L_f^2} \\
& \leq \frac{\mathbb{E}[F(\bar{x}_0) - F(x_*)]}{T} + \frac{\eta\beta(3C_g^2\sigma_f^2 + 3C_f^2\sigma_{g'}^2 + C_g^2L_f^2\sigma_g^2 + 24\gamma\sigma_g^2)}{B} + \frac{24C_f^2\sigma_{g'}^2 + 8C_g^2\sigma_f^2 + 3C_g^2L_f^2\sigma_g^2}{B} \frac{\gamma\eta\beta}{4C_g^2L_f^2} \\
& \quad + \frac{3\eta C_g^2L_f^2\sigma_g^2}{\gamma B} + \frac{24\eta\sigma^2}{B} + \frac{\gamma\eta\beta}{C_g^2L_f^2} \frac{6C_f^2\sigma_{g'}^2 + 2C_g^2\sigma_f^2 + 24C_g^2L_f^2\sigma_g^2}{B},
\end{aligned} \tag{51}$$

where the last step holds due to  $P_T \geq F(\bar{x}_T) \geq F(x_*)$  and

$$\begin{aligned}
P_0 &= \mathbb{E}[F(\bar{x}_0)] + \frac{3\eta C_g^2 L_f^2}{\gamma} \frac{1}{K} \sum_{k=1}^K \mathbb{E}[\|u_0^{(k)} - g^{(k)}(x_0^{(k)})\|^2] + \frac{4\eta}{K} \sum_{k=1}^K \mathbb{E}[\|u_0^{(k)} - \bar{u}_0\|^2] \\
&\quad + \frac{\gamma\eta\beta}{4C_g^2 L_f^2} \frac{1}{K} \sum_{k=1}^K \mathbb{E}[\|z_0^{(k)} - \bar{z}_0\|^2] + \frac{1}{K} \sum_{k=1}^K \mathbb{E}[\|x_0^{(k)} - \bar{x}_0\|^2] \\
&\leq \mathbb{E}[F(\bar{x}_0)] + \frac{3\eta C_g^2 L_f^2 \sigma_g^2}{\gamma B} + \frac{24\eta\sigma^2}{B} + \frac{\gamma\eta\beta}{C_g^2 L_f^2} \frac{6C_f^2 \sigma_{g'}^2 + 2C_g^2 \sigma_f^2 + 24C_g^2 L_f^2 \sigma^2}{B}.
\end{aligned} \tag{52}$$

By dividing  $\frac{\eta\beta}{2}$  on both sides of the previous inequality, we can get

$$\begin{aligned}
&\frac{1}{T} \sum_{t=0}^{T-1} \mathbb{E}[\|\nabla F(\bar{x}_t)\|^2] \\
&\leq \frac{2\mathbb{E}[F(\bar{x}_0) - F(x_*)]}{\eta\beta T} + \frac{2(3C_g^2 \sigma_f^2 + 3C_f^2 \sigma_{g'}^2 + C_g^2 L_f^2 \sigma_g^2 + 24\gamma\sigma_g^2)}{B} \\
&\quad + \frac{48C_f^2 \sigma_{g'}^2 + 16C_g^2 \sigma_f^2 + 99C_g^2 L_f^2 \sigma_g^2}{16\beta C_g^2 L_f^2 B} + \frac{6C_g^2 L_f^2 \sigma_g^2}{\beta\gamma B} + \frac{48\sigma^2}{\beta B}.
\end{aligned} \tag{53}$$

□

## A.2 Convergence Analysis of Algorithm 2

**Lemma 8.** *In terms of Assumptions 2-4, by setting  $\beta_t \leq \frac{1}{2\eta L_F}$ , the following inequality holds.*

$$\begin{aligned}
\mathbb{E}[F(\bar{x}_{t+1})] &\leq \mathbb{E}[F(\bar{x}_t)] - \frac{\eta\beta_t}{2} \mathbb{E}[\|\nabla F(\bar{x}_t)\|^2] - \frac{\eta\beta_t}{4} \mathbb{E}[\|\bar{s}_t\|^2] + \frac{\eta\beta_t L_F^2}{K} \sum_{k=1}^K \mathbb{E}[\|x_t^{(k)} - \bar{x}_t\|^2] \\
&\quad + \frac{3}{K} \sum_{k=1}^K \frac{\eta\beta_t C_g^2 \sigma_f^2}{|\mathcal{A}_t^{(k)}|} + \frac{3\eta\beta_t C_g^2 L_f^2}{K} \sum_{k=1}^K \mathbb{E}[\|u_t^{(k)} - g^{(k)}(x_t^{(k)})\|^2] + \frac{3}{K} \sum_{k=1}^K \frac{\eta\beta_t C_f^2 \sigma_{g'}^2}{|\mathcal{B}_t^{(k)}|}.
\end{aligned} \tag{54}$$

**Lemma 9.** *In terms of Assumptions 2-4, by setting  $0 < \beta_t \leq \frac{1}{8\gamma}$ , the following inequality holds.*

$$\begin{aligned}
&\mathbb{E}[\|u_{t+1}^{(k)} - g^{(k)}(x_{t+1}^{(k)})\|^2] \\
&\leq (1 - \gamma\beta_t) \mathbb{E}[\|u_t^{(k)} - g^{(k)}(x_t^{(k)})\|^2] + \frac{9\beta_t C_g^2}{8\gamma} \mathbb{E}[\|\tilde{x}_{t+1}^{(k)} - x_t^{(k)}\|^2] + \frac{\beta_t^2 \gamma^2 \sigma_g^2}{|\mathcal{B}_{t+1}^{(k)}|}.
\end{aligned} \tag{55}$$

**Lemma 10.** *In terms of Assumption 1, the following inequality holds.*

$$\sum_{k=1}^K \mathbb{E}[\|\tilde{x}_{t+1}^{(k)} - x_t^{(k)}\|^2] \leq 8 \sum_{k=1}^K \mathbb{E}[\|x_t^{(k)} - \bar{x}_t\|^2] + 4\eta^2 \sum_{k=1}^K \mathbb{E}[\|s_t^{(k)} - \bar{s}_t\|^2] + 4\eta^2 K \mathbb{E}[\|\bar{s}_t\|^2]. \tag{56}$$

**Lemma 11.** *In terms of Assumption 1, the following inequality holds.*

$$\sum_{k=1}^K \mathbb{E}[\|x_{t+1}^{(k)} - \bar{x}_{t+1}\|^2] \leq \left(1 - \beta_t + \frac{\beta_t(1 + \lambda^2)}{2}\right) \sum_{k=1}^K \mathbb{E}[\|x_t^{(k)} - \bar{x}_t\|^2] + \frac{2\beta_t\eta^2}{1 - \lambda^2} \sum_{k=1}^K \mathbb{E}[\|s_t^{(k)} - \bar{s}_t\|^2]. \tag{57}$$

The above four lemmas can be proved by exactly following Lemmas 1, 3, 7, 6, respectively. Thus, we omit their proof.

**Lemma 12.** *In terms of Assumption 2-4, the following inequality holds.*

$$\sum_{k=1}^K \mathbb{E}[\|u_{t+1}^{(k)} - u_t^{(k)}\|^2] \leq \sum_{k=1}^K 3\gamma^2 \beta_t^2 \left( \mathbb{E}[\|u_t^{(k)} - g^{(k)}(x_t^{(k)})\|^2] + C_g^2 \beta_t^2 \mathbb{E}[\|\tilde{x}_{t+1}^{(k)} - x_t^{(k)}\|^2] + \frac{\sigma_g^2}{|\mathcal{B}_{t+1}^{(k)}|} \right). \tag{58}$$



*Proof.* In terms of the definition of  $u_t^{(k)}$ , we can get

$$\begin{aligned}
& \sum_{k=1}^K \mathbb{E}[\|u_{t+1}^{(k)} - u_t^{(k)}\|^2] \\
&= \sum_{k=1}^K \gamma^2 \beta_t^2 \mathbb{E}[\|u_t^{(k)} - g^{(k)}(x_{t+1}^{(k)}; \mathcal{B}_{t+1}^{(k)})\|^2] \\
&= \sum_{k=1}^K \gamma^2 \beta_t^2 \mathbb{E}[\|u_t^{(k)} - g^{(k)}(x_t^{(k)}) + g^{(k)}(x_t^{(k)}) - g^{(k)}(x_{t+1}^{(k)}) + g^{(k)}(x_{t+1}^{(k)}) - g^{(k)}(x_{t+1}^{(k)}; \mathcal{B}_{t+1}^{(k)})\|^2] \\
&\leq \sum_{k=1}^K 3\gamma^2 \beta_t^2 \left( \mathbb{E}[\|u_t^{(k)} - g^{(k)}(x_t^{(k)})\|^2] + \mathbb{E}[\|g^{(k)}(x_t^{(k)}) - g^{(k)}(x_{t+1}^{(k)})\|^2] \right. \\
&\quad \left. + \mathbb{E}[\|g^{(k)}(x_{t+1}^{(k)}) - g^{(k)}(x_{t+1}^{(k)}; \mathcal{B}_{t+1}^{(k)})\|^2] \right) \\
&\leq \sum_{k=1}^K 3\gamma^2 \beta_t^2 \left( \mathbb{E}[\|u_t^{(k)} - g^{(k)}(x_t^{(k)})\|^2] + C_g^2 \beta_t^2 \mathbb{E}[\|\hat{x}_{t+1}^{(k)} - x_t^{(k)}\|^2] + \frac{\sigma_g^2}{|\mathcal{B}_{t+1}^{(k)}|} \right),
\end{aligned} \tag{59}$$

where the last inequality holds due to Assumptions 3 and 4.  $\square$

**Lemma 13.** *In terms of Assumptions 2-4, the following inequality holds.*

$$\begin{aligned}
\sum_{k=1}^K \mathbb{E}[\|h_{t+1}^{(k)} - \bar{h}_{t+1}\|^2] &\leq \lambda \sum_{k=1}^K \mathbb{E}[\|h_t^{(k)} - \bar{h}_t\|^2] + \frac{2C_g^2 L_f^2}{1-\lambda} \sum_{k=1}^K \mathbb{E}[\|u_{t+1}^{(k)} - u_t^{(k)}\|^2] \\
&\quad + \frac{2\beta_t^2 C_f^2 L_g^2}{1-\lambda} \sum_{k=1}^K \mathbb{E}[\|\hat{x}_{t+1}^{(k)} - x_t^{(k)}\|^2], \\
\sum_{k=1}^K \mathbb{E}[\|h_0^{(k)} - \bar{h}_0\|^2] &\leq \frac{48KC_g^2 L_f^2 \sigma^2}{|\mathcal{B}_0^{(k)}|}.
\end{aligned} \tag{60}$$

*Proof.* In terms of the definition of  $h_{t+1}^{(k)}$ , we can get

$$\begin{aligned}
& \sum_{k=1}^K \mathbb{E}[\|h_{t+1}^{(k)} - \bar{h}_{t+1}\|^2] \\
&= \mathbb{E}[\|H_{t+1} - \bar{H}_{t+1}\|_F^2] \\
&= \mathbb{E}[\|H_t W + Q_{t+1} - Q_t - \bar{H}_t - \bar{Q}_{t+1} + \bar{Q}_t\|_F^2] \\
&\leq (1+a) \mathbb{E}[\|H_t W - \bar{H}_t\|_F^2] + \left(1 + \frac{1}{a}\right) \mathbb{E}[\|Q_{t+1} - Q_t - \bar{Q}_{t+1} + \bar{Q}_t\|_F^2] \\
&\leq (1+a)\lambda^2 \mathbb{E}[\|H_t - \bar{H}_t\|_F^2] + \left(1 + \frac{1}{a}\right) \mathbb{E}[\|Q_{t+1} - Q_t\|_F^2] \\
&= \lambda \sum_{k=1}^K \mathbb{E}[\|h_t^{(k)} - \bar{h}_t\|^2] + \frac{1}{1-\lambda} \sum_{k=1}^K \mathbb{E}[\|q_{t+1}^{(k)} - q_t^{(k)}\|^2],
\end{aligned} \tag{61}$$

where the last step holds due to  $a = \frac{1-\lambda}{\lambda}$ . In the following, we will bound the second term in the last inequality.

$$\begin{aligned}
& \sum_{k=1}^K \mathbb{E}[\|q_{t+1}^{(k)} - q_t^{(k)}\|^2] \\
&= \sum_{k=1}^K \mathbb{E}[\|\nabla g^{(k)}(x_{t+1}^{(k)})^T \nabla f^{(k)}(u_{t+1}^{(k)}) - \nabla g^{(k)}(x_t^{(k)})^T \nabla f^{(k)}(u_t^{(k)})\|^2] \\
&= \sum_{k=1}^K \mathbb{E}[\|\nabla g^{(k)}(x_{t+1}^{(k)})^T \nabla f^{(k)}(u_{t+1}^{(k)}) - \nabla g^{(k)}(x_{t+1}^{(k)})^T \nabla f^{(k)}(u_t^{(k)}) \\
&\quad + \nabla g^{(k)}(x_{t+1}^{(k)})^T \nabla f^{(k)}(u_t^{(k)}) - \nabla g^{(k)}(x_t^{(k)})^T \nabla f^{(k)}(u_t^{(k)})\|^2] \\
&\leq \sum_{k=1}^K 2\mathbb{E}[\|\nabla g^{(k)}(x_{t+1}^{(k)})^T \nabla f^{(k)}(u_{t+1}^{(k)}) - \nabla g^{(k)}(x_{t+1}^{(k)})^T \nabla f^{(k)}(u_t^{(k)})\|^2] \\
&\quad + \sum_{k=1}^K 2\mathbb{E}[\|\nabla g^{(k)}(x_{t+1}^{(k)})^T \nabla f^{(k)}(u_t^{(k)}) - \nabla g^{(k)}(x_t^{(k)})^T \nabla f^{(k)}(u_t^{(k)})\|^2] \\
&\leq \sum_{k=1}^K 2C_g^2 \mathbb{E}[\|\nabla f^{(k)}(u_{t+1}^{(k)}) - \nabla f^{(k)}(u_t^{(k)})\|^2] + \sum_{k=1}^K 2C_f^2 \mathbb{E}[\|\nabla g^{(k)}(x_{t+1}^{(k)}) - \nabla g^{(k)}(x_t^{(k)})\|^2] \\
&\leq \sum_{k=1}^K 2C_g^2 L_f^2 \mathbb{E}[\|u_{t+1}^{(k)} - u_t^{(k)}\|^2] + \sum_{k=1}^K 2\beta_t^2 C_f^2 L_g^2 \mathbb{E}[\|\tilde{x}_{t+1}^{(k)} - x_t^{(k)}\|^2], \tag{62}
\end{aligned}$$

where the last step holds due to Assumptions 2-4. By combining above two inequalities, the proof for the first part is completed. When  $t = 0$ , we can get

$$\begin{aligned}
& \sum_{k=1}^K \mathbb{E}[\|h_0^{(k)} - \bar{h}_0\|^2] \\
&= \sum_{k=1}^K \mathbb{E}[\|\nabla g^{(k)}(x_0^{(k)})^T \nabla_g f^{(k)}(u_0^{(k)}) - \frac{1}{K} \sum_{k'=1}^K \nabla g^{(k')} (x_0^{(k')})^T \nabla_g f^{(k')} (u_0^{(k')})\|^2] \\
&= \sum_{k=1}^K \mathbb{E}[\|\nabla g^{(k)}(x_0^{(k)})^T \nabla_g f^{(k)}(u_0^{(k)}) - \frac{1}{K} \sum_{k'=1}^K \nabla g^{(k')} (x_0^{(k')})^T \nabla_g f^{(k)}(u_0^{(k)}) \\
&\quad + \frac{1}{K} \sum_{k'=1}^K \nabla g^{(k')} (x_0^{(k')})^T \nabla_g f^{(k)}(u_0^{(k)}) - \frac{1}{K} \sum_{k'=1}^K \nabla g^{(k')} (x_0^{(k')})^T \nabla_g f^{(k')} (u_0^{(k')})\|^2] \\
&\leq \sum_{k=1}^K 2\mathbb{E}[\|\nabla g^{(k)}(x_0^{(k)})^T \nabla_g f^{(k)}(u_0^{(k)}) - \frac{1}{K} \sum_{k'=1}^K \nabla g^{(k')} (x_0^{(k')})^T \nabla_g f^{(k)}(u_0^{(k)})\|^2] \\
&\quad + \sum_{k=1}^K 2\mathbb{E}[\|\frac{1}{K} \sum_{k'=1}^K \nabla g^{(k')} (x_0^{(k')})^T \nabla_g f^{(k)}(u_0^{(k)}) - \frac{1}{K} \sum_{k'=1}^K \nabla g^{(k')} (x_0^{(k')})^T \nabla_g f^{(k')} (u_0^{(k')})\|^2] \\
&\leq \sum_{k=1}^K 2C_f^2 \mathbb{E}[\|\nabla g^{(k)}(x_0^{(k)}) - \frac{1}{K} \sum_{k'=1}^K \nabla g^{(k')} (x_0^{(k')})\|^2] + \sum_{k=1}^K 2C_g^2 \mathbb{E}[\|\nabla_g f^{(k)}(u_0^{(k)}) - \frac{1}{K} \sum_{k'=1}^K \nabla_g f^{(k')} (u_0^{(k')})\|^2] \\
&\leq 8C_g^2 L_f^2 \sum_{k'=1}^K \mathbb{E}[\|u_0^{(k')} - \bar{u}_0\|^2] \\
&\leq \frac{48KC_g^2 L_f^2 \sigma^2}{|\mathcal{B}_0^{(k)}|}. \tag{63}
\end{aligned}$$

□

**Lemma 14.** *In terms of Assumptions 2-4, by setting  $|\mathcal{A}_t^{(k)}| = |\mathcal{B}_t^{(k)}| = B$ , the following inequality holds.*

$$\begin{aligned} \sum_{k=1}^K \mathbb{E}[\|s_t^{(k)} - \bar{s}_t\|^2] &\leq 3 \sum_{k=1}^K \mathbb{E}[\|h_t^{(k)} - \bar{h}_t\|^2] \\ &+ \frac{6K(2C_f^2\sigma_{g'}^2 + 2C_g^2\sigma_f^2)}{B} + \frac{12K(2C_f^2\sigma_{g'}^2 + 2C_g^2\sigma_f^2)}{B} \frac{1}{1-\lambda^2}. \end{aligned} \quad (64)$$

*Proof.* In terms of the definition of  $q_t^{(k)}$ , we can get

$$\begin{aligned} &\mathbb{E}[\|z_t^{(k)} - q_t^{(k)}\|^2] \\ &= \mathbb{E}[\|\nabla g^{(k)}(x_t^{(k)}; \mathcal{B}_t^{(k)})^T \nabla g f^{(k)}(u_t^{(k)}; \mathcal{A}_t^{(k)}) - \nabla g^{(k)}(x_t^{(k)})^T \nabla g f^{(k)}(u_t^{(k)})\|^2] \\ &= \mathbb{E}[\|\nabla g^{(k)}(x_t^{(k)}; \mathcal{B}_t^{(k)})^T \nabla g f^{(k)}(u_t^{(k)}; \mathcal{A}_t^{(k)}) - \nabla g^{(k)}(x_t^{(k)})^T \nabla g f^{(k)}(u_t^{(k)}; \mathcal{A}_t^{(k)}) \\ &\quad + \nabla g^{(k)}(x_t^{(k)})^T \nabla g f^{(k)}(u_t^{(k)}; \mathcal{A}_t^{(k)}) - \nabla g^{(k)}(x_t^{(k)})^T \nabla g f^{(k)}(u_t^{(k)})\|^2] \\ &\leq \frac{2C_f^2\sigma_{g'}^2 + 2C_g^2\sigma_f^2}{B}, \end{aligned} \quad (65)$$

where the last inequality holds due to Assumptions 3, 4, and  $|\mathcal{A}_t^{(k)}| = |\mathcal{B}_t^{(k)}| = B$ . Meanwhile, we can get

$$\begin{aligned} &\sum_{k=1}^K \mathbb{E}[\|s_t^{(k)} - \bar{s}_t\|^2] \\ &= \sum_{k=1}^K \mathbb{E}[\|s_t^{(k)} - h_t^{(k)} + h_t^{(k)} - \bar{h}_t + \bar{h}_t - \bar{s}_t\|^2] \\ &\leq 3 \sum_{k=1}^K \mathbb{E}[\|s_t^{(k)} - h_t^{(k)}\|^2] + 3 \sum_{k=1}^K \mathbb{E}[\|h_t^{(k)} - \bar{h}_t\|^2] + 3 \sum_{k=1}^K \mathbb{E}[\|\bar{h}_t - \bar{s}_t\|^2]. \end{aligned} \quad (66)$$

In the following, we will bound the first and last terms in the last inequality, respectively.

$$\begin{aligned} &\sum_{k=1}^K \mathbb{E}[\|s_{t+1}^{(k)} - h_{t+1}^{(k)}\|^2] \\ &= \mathbb{E}[\|S_{t+1} - H_{t+1}\|_F^2] \\ &= \mathbb{E}[\|S_t W + Z_{t+1} - Z_t - H_t W - Q_{t+1} + Q_t\|_F^2] \\ &= \mathbb{E}[\|Z_{t+1} - Q_{t+1}\|_F^2] + \mathbb{E}[\|(S_t - H_t)W - (Z_t - Q_t)\|_F^2] \\ &= \mathbb{E}[\|Z_{t+1} - Q_{t+1}\|_F^2] + \mathbb{E}[\|(S_{t-1}W + Z_t - Z_{t-1} - H_{t-1}W - Q_t + Q_{t-1})W - (Z_t - Q_t)\|_F^2] \\ &= \mathbb{E}[\|Z_{t+1} - Q_{t+1}\|_F^2] + \mathbb{E}[\|(S_{t-1} - H_{t-1})W^2 - (Z_{t-1} - Q_{t-1})W + (Z_t - Q_t)(W - I)\|_F^2] \\ &= \mathbb{E}[\|Z_{t+1} - Q_{t+1}\|_F^2] + \mathbb{E}[\|(Z_t - Q_t)(W - I)\|_F^2] + \mathbb{E}[\|(S_{t-1} - H_{t-1})W^2 - (Z_{t-1} - Q_{t-1})W\|_F^2] \\ &= \mathbb{E}[\|Z_{t+1} - Q_{t+1}\|_F^2] + \mathbb{E}[\|(Z_t - Q_t)\|_F^2 \|W - I\|_2^2] + \mathbb{E}[\|(S_{t-1} - H_{t-1})W^2 - (Z_{t-1} - Q_{t-1})W\|_F^2] \\ &= \mathbb{E}[\|Z_{t+1} - Q_{t+1}\|_F^2] + \sum_{j=0}^t \mathbb{E}[\|Z_j - Q_j\|_F^2 \|W^{t-j}(W - I)\|_2^2] \\ &\leq \frac{(2C_f^2\sigma_{g'}^2 + 2C_g^2\sigma_f^2)K}{B} + \frac{4K(2C_f^2\sigma_{g'}^2 + 2C_g^2\sigma_f^2)}{B} \sum_{j=0}^t \lambda^{2j} \\ &\leq \frac{K(2C_f^2\sigma_{g'}^2 + 2C_g^2\sigma_f^2)}{B} + \frac{4K(2C_f^2\sigma_{g'}^2 + 2C_g^2\sigma_f^2)}{B} \frac{1}{1-\lambda^2}, \end{aligned} \quad (67)$$

where the first inequality holds due to Eq. (65), the last inequality holds due to  $\lambda < 1$ . Additionally, we can get

$$\begin{aligned}
& \sum_{k=1}^K \mathbb{E}[\|\bar{h}_t - \bar{s}_t\|^2] \\
&= \sum_{k=1}^K \mathbb{E}[\|\frac{1}{K} \sum_{k=1}^K \nabla g^{(k)}(x_t^{(k)})^T \nabla_g f^{(k)}(u_t^{(k)}) - \frac{1}{K} \sum_{k=1}^K \nabla g^{(k)}(x_t^{(k)}; \mathcal{B}_t^{(k)})^T \nabla_g f^{(k)}(u_t^{(k)}; \mathcal{A}_t^{(k)})\|^2] \\
&\leq \sum_{k=1}^K \frac{1}{K} \sum_{k=1}^K \mathbb{E}[\|\nabla g^{(k)}(x_t^{(k)})^T \nabla_g f^{(k)}(u_t^{(k)}) - \nabla g^{(k)}(x_t^{(k)}; \mathcal{B}_t^{(k)})^T \nabla_g f^{(k)}(u_t^{(k)}; \mathcal{A}_t^{(k)})\|^2] \quad (68) \\
&= \sum_{k=1}^K \frac{1}{K} \sum_{k=1}^K \mathbb{E}[\|\nabla g^{(k)}(x_t^{(k)})^T \nabla_g f^{(k)}(u_t^{(k)}) - \nabla g^{(k)}(x_t^{(k)})^T \nabla_g f^{(k)}(u_t^{(k)}; \mathcal{A}_t^{(k)}) \\
&\quad + \nabla g^{(k)}(x_t^{(k)})^T \nabla_g f^{(k)}(u_t^{(k)}; \mathcal{A}_t^{(k)}) - \nabla g^{(k)}(x_t^{(k)}; \mathcal{B}_t^{(k)})^T \nabla_g f^{(k)}(u_t^{(k)}; \mathcal{A}_t^{(k)})\|^2] \\
&\leq \frac{K(2C_g^2\sigma_f^2 + 2C_f^2\sigma_{g'}^2)}{B},
\end{aligned}$$

where the last inequality holds due to Assumptions 3, 4, and  $|\mathcal{A}_t^{(k)}| = |\mathcal{B}_t^{(k)}| = B$ . By combining above three inequalities, the proof is completed.  $\square$

Similar to the proof of Theorem 1, we set  $\beta_t = \beta$ ,  $|\mathcal{A}_t^k| = |\mathcal{B}_t^k| = B$ , and introduce a new potential function, which is defined as follows:

$$\begin{aligned}
P_t &= \mathbb{E}[F(\bar{x}_t)] + \frac{4\eta C_g^2 L_f^2}{\gamma} \frac{1}{K} \sum_{k=1}^K \mathbb{E}[\|u_t^{(k)} - g^{(k)}(x_t^{(k)})\|^2] + \frac{\eta(1-\lambda)}{\gamma} \frac{1}{K} \sum_{k=1}^K \mathbb{E}[\|h_t^{(k)} - \bar{h}_t\|^2] \\
&\quad + \frac{1}{\gamma} \frac{1}{K} \sum_{k=1}^K \mathbb{E}[\|x_t^{(k)} - \bar{x}_t\|^2]. \quad (69)
\end{aligned}$$

In terms of these lemmas and definition, we are ready to prove Theorem 2.

*Proof.*

$$\begin{aligned}
& P_{t+1} - P_t \\
& \leq -\frac{\eta\beta}{2}\mathbb{E}[\|\nabla F(\bar{x}_t)\|^2] \\
& \quad + \frac{3\eta\beta C_g^2 \sigma_f^2}{B} + \frac{3\eta\beta C_f^2 \sigma_{g'}^2}{B} + \frac{\beta^2 \gamma^2 \sigma_g^2}{B} \frac{4\eta C_g^2 L_f^2}{\gamma} + \frac{6\gamma^2 \beta^2 C_g^2 L_f^2 \sigma_g^2}{(1-\lambda)B} \frac{\eta(1-\lambda)}{\gamma} \\
& \quad + \frac{6(2C_f^2 \sigma_{g'}^2 + 2C_g^2 \sigma_f^2)}{B} \frac{2\beta\eta^2}{1-\lambda^2} \frac{1}{\gamma} + \frac{12(2C_f^2 \sigma_{g'}^2 + 2C_g^2 \sigma_f^2)}{B} \frac{1}{1-\lambda^2} \frac{2\beta\eta^2}{1-\lambda^2} \frac{1}{\gamma} \\
& \quad + \left(3\eta\beta C_g^2 L_f^2 - \gamma\beta \frac{4\eta C_g^2 L_f^2}{\gamma} + \frac{6\gamma^2 \beta^2 C_g^2 L_f^2}{1-\lambda} \frac{\eta(1-\lambda)}{\gamma}\right) \frac{1}{K} \sum_{k=1}^K \mathbb{E}[\|u_t^{(k)} - g^{(k)}(x_t^{(k)})\|^2] \\
& \quad + \left(\eta\beta L_F^2 + \frac{9\beta C_g^2}{\gamma} \frac{4\eta C_g^2 L_f^2}{\gamma} + \left(\frac{2\beta^2 C_f^2 L_g^2}{1-\lambda} + \frac{6\gamma^2 \beta^4 C_g^4 L_f^2}{1-\lambda}\right) 8\right) \frac{\eta(1-\lambda)}{\gamma} \\
& \quad + \left(-\beta + \frac{\beta(1+\lambda^2)}{2}\right) \frac{1}{\gamma} \frac{1}{K} \sum_{k=1}^K \mathbb{E}[\|x_t^{(k)} - \bar{x}_t\|^2] \tag{70} \\
& \quad + \left(\frac{9\eta^2 \beta C_g^2}{2\gamma} \frac{4\eta C_g^2 L_f^2}{\gamma} + \left(\frac{2\beta^2 C_f^2 L_g^2}{1-\lambda} + \frac{6\gamma^2 \beta^4 C_g^4 L_f^2}{1-\lambda}\right) 4\eta^2 \frac{\eta(1-\lambda)}{\gamma} - \frac{\eta\beta}{4}\right) \mathbb{E}[\|\bar{s}_t\|^2] \\
& \quad + \left(\frac{27\eta^2 \beta C_g^2}{2\gamma} \frac{4\eta C_g^2 L_f^2}{\gamma} + \left(\frac{2\beta^2 C_f^2 L_g^2}{1-\lambda} + \frac{6\gamma^2 \beta^4 C_g^4 L_f^2}{1-\lambda}\right) 12\eta^2 \frac{\eta(1-\lambda)}{\gamma}\right) \\
& \quad + \left((\lambda-1) \frac{\eta(1-\lambda)}{\gamma} + \frac{6\beta\eta^2}{1-\lambda^2} \frac{1}{\gamma}\right) \frac{1}{K} \sum_{k=1}^K \mathbb{E}[\|h_t^{(k)} - \bar{h}_t\|^2] \\
& \quad + \left(\frac{9\eta^2 \beta C_g^2}{2\gamma} \frac{4\eta C_g^2 L_f^2}{\gamma} + \left(\frac{2\beta^2 C_f^2 L_g^2}{1-\lambda} + \frac{6\gamma^2 \beta^4 C_g^4 L_f^2}{1-\lambda}\right) 4\eta^2 \frac{\eta(1-\lambda)}{\gamma}\right) \frac{6(2C_f^2 \sigma_{g'}^2 + 2C_g^2 \sigma_f^2)}{B} \\
& \quad + \left(\frac{9\eta^2 \beta C_g^2}{2\gamma} \frac{4\eta C_g^2 L_f^2}{\gamma} + \left(\frac{2\beta^2 C_f^2 L_g^2}{1-\lambda} + \frac{6\gamma^2 \beta^4 C_g^4 L_f^2}{1-\lambda}\right) 4\eta^2 \frac{\eta(1-\lambda)}{\gamma}\right) \frac{12(2C_f^2 \sigma_{g'}^2 + 2C_g^2 \sigma_f^2)}{B(1-\lambda^2)}.
\end{aligned}$$

By setting  $\beta \leq \min\{\frac{1}{8\gamma}, \frac{1}{2\eta L_F}, 1\}$ ,  $\gamma > 0$ , and  $\eta \leq \min\{\eta_1, \eta_2, \eta_3\}$ , where

$$\begin{aligned}
\eta_1 &= \frac{4\gamma(1-\lambda^2)}{8\gamma^2 L_F^2 + 289C_g^4 L_f^2 + 16C_f^2 L_g^2} \\
\eta_2 &= \frac{\gamma}{2\sqrt{19C_g^4 L_f^2 + C_f^2 L_g^2}} \\
\eta_3 &= \frac{\sqrt{b^2 + 4ac} - b}{2a}, a = \frac{27C_g^4 L_f^2}{4\gamma^2} + \frac{3C_f^2 L_g^2}{8\gamma^2} + \frac{3C_g^4 L_f^2}{128\gamma^2}, b = \frac{6}{1-\lambda^2}, c = (1-\lambda)^2,
\end{aligned} \tag{71}$$

we can get

$$\begin{aligned}
& P_{t+1} - P_t \\
& \leq -\frac{\eta\beta}{2}\mathbb{E}[\|\nabla F(\bar{x}_t)\|^2] \\
& \quad + \frac{3\eta\beta C_g^2 \sigma_f^2}{B} + \frac{3\eta\beta C_f^2 \sigma_{g'}^2}{B} + \frac{4\gamma\eta\beta^2 C_g^2 L_f^2 \sigma_g^2}{B} + \frac{6\gamma\eta\beta^2 C_g^2 L_f^2 \sigma_g^2}{B} \\
& \quad + \frac{24\beta\eta^2 (C_f^2 \sigma_{g'}^2 + C_g^2 \sigma_f^2)}{\gamma(1-\lambda^2)B} + \frac{48\beta\eta^2 (C_f^2 \sigma_{g'}^2 + C_g^2 \sigma_f^2)}{\gamma(1-\lambda^2)^2 B} \\
& \quad + \left(\frac{18\eta^3 \beta C_g^4 L_f^2}{\gamma^2} + \frac{8\eta^3 \beta^2 C_f^2 L_g^2}{\gamma} + \frac{24\gamma^2 \eta^3 \beta^4 C_g^4 L_f^2}{\gamma}\right) \frac{12(C_f^2 \sigma_{g'}^2 + C_g^2 \sigma_f^2)}{B} \\
& \quad + \left(\frac{18\eta^3 \beta C_g^4 L_f^2}{\gamma^2} + \frac{8\eta^3 \beta^2 C_f^2 L_g^2}{\gamma} + \frac{24\gamma^2 \eta^3 \beta^4 C_g^4 L_f^2}{\gamma}\right) \frac{24(C_f^2 \sigma_{g'}^2 + C_g^2 \sigma_f^2)}{B(1-\lambda^2)}.
\end{aligned} \tag{72}$$

By summing over  $t$  from 0 to  $T - 1$ , we can get

$$\begin{aligned}
& \frac{1}{T} \sum_{t=0}^{T-1} \frac{\eta\beta}{2} \mathbb{E}[\|\nabla F(\bar{x}_t)\|^2] \\
& \leq \frac{P_0 - P_T}{T} + \frac{3\eta\beta C_g^2 \sigma_f^2}{B} + \frac{3\eta\beta C_f^2 \sigma_{g'}^2}{B} + \frac{4\gamma\eta\beta^2 C_g^2 L_f^2 \sigma_g^2}{B} + \frac{6\gamma\eta\beta^2 C_g^2 L_f^2 \sigma_g^2}{B} \\
& \quad + \frac{24\beta\eta^2 (C_f^2 \sigma_{g'}^2 + C_g^2 \sigma_f^2)}{\gamma(1-\lambda^2)B} + \frac{48\beta\eta^2 (C_f^2 \sigma_{g'}^2 + C_g^2 \sigma_f^2)}{\gamma(1-\lambda^2)^2 B} \\
& \quad + \left( \frac{18\eta^3 \beta C_g^4 L_f^2}{\gamma^2} + \frac{8\eta^3 \beta^2 C_f^2 L_g^2}{\gamma} + \frac{24\gamma^2 \eta^3 \beta^4 C_g^4 L_f^2}{\gamma} \right) \frac{12(C_f^2 \sigma_{g'}^2 + C_g^2 \sigma_f^2)}{B} \\
& \quad + \left( \frac{18\eta^3 \beta C_g^4 L_f^2}{\gamma^2} + \frac{8\eta^3 \beta^2 C_f^2 L_g^2}{\gamma} + \frac{24\gamma^2 \eta^3 \beta^4 C_g^4 L_f^2}{\gamma} \right) \frac{24(C_f^2 \sigma_{g'}^2 + C_g^2 \sigma_f^2)}{B(1-\lambda^2)} \\
& \leq \frac{\mathbb{E}[F(x_0) - F(x_*)]}{T} + \frac{3\eta\beta C_g^2 \sigma_f^2}{B} + \frac{3\eta\beta C_f^2 \sigma_{g'}^2}{B} + \frac{4\gamma\eta\beta^2 C_g^2 L_f^2 \sigma_g^2}{B} + \frac{6\gamma\eta\beta^2 C_g^2 L_f^2 \sigma_g^2}{B} \\
& \quad + \frac{24\beta\eta^2 (C_f^2 \sigma_{g'}^2 + C_g^2 \sigma_f^2)}{\gamma(1-\lambda^2)B} + \frac{48\beta\eta^2 (C_f^2 \sigma_{g'}^2 + C_g^2 \sigma_f^2)}{\gamma(1-\lambda^2)^2 B} + \frac{4\eta C_g^2 L_f^2 \sigma_g^2 + 48\eta(1-\lambda)C_g^2 L_f^2 \sigma^2}{\gamma B} \\
& \quad + \left( \frac{18\eta^3 \beta C_g^4 L_f^2}{\gamma^2} + \frac{8\eta^3 \beta^2 C_f^2 L_g^2}{\gamma} + \frac{24\gamma^2 \eta^3 \beta^4 C_g^4 L_f^2}{\gamma} \right) \frac{12(C_f^2 \sigma_{g'}^2 + C_g^2 \sigma_f^2)}{B} \\
& \quad + \left( \frac{18\eta^3 \beta C_g^4 L_f^2}{\gamma^2} + \frac{8\eta^3 \beta^2 C_f^2 L_g^2}{\gamma} + \frac{24\gamma^2 \eta^3 \beta^4 C_g^4 L_f^2}{\gamma} \right) \frac{24(C_f^2 \sigma_{g'}^2 + C_g^2 \sigma_f^2)}{B(1-\lambda^2)} \\
& \quad + \frac{4\eta C_g^2 L_f^2 \sigma_g^2 + 48\eta(1-\lambda)C_g^2 L_f^2 \sigma^2}{\gamma B},
\end{aligned} \tag{73}$$

where the last step holds due to  $P_T > F(x_*)$  and

$$\begin{aligned}
P_0 &= \mathbb{E}[F(\bar{x}_0)] + \frac{4\eta C_g^2 L_f^2}{\gamma} \frac{1}{K} \sum_{k=1}^K \mathbb{E}[\|u_0^{(k)} - g^{(k)}(x_0^{(k)})\|^2] + \frac{\eta(1-\lambda)}{\gamma} \frac{1}{K} \sum_{k=1}^K \mathbb{E}[\|h_0^{(k)} - \bar{h}_0\|^2] \\
& \quad + \frac{1}{\gamma} \frac{1}{K} \sum_{k=1}^K \mathbb{E}[\|x_0^{(k)} - \bar{x}_0\|^2] \\
& \leq \mathbb{E}[F(\bar{x}_0)] + \frac{4\eta C_g^2 L_f^2 \sigma_g^2 + 48\eta(1-\lambda)C_g^2 L_f^2 \sigma^2}{\gamma B}.
\end{aligned} \tag{74}$$

By dividing  $\frac{\eta\beta}{2}$  on both sides of this inequality, we can get

$$\begin{aligned}
& \frac{1}{T} \sum_{t=0}^{T-1} \mathbb{E}[\|\nabla F(\bar{x}_t)\|^2] \\
& \leq \frac{2\mathbb{E}[F(x_0) - F(x_*)]}{\eta\beta T} + \frac{6C_g^2 \sigma_f^2}{B} + \frac{6C_f^2 \sigma_{g'}^2}{B} + \frac{8\gamma\beta C_g^2 L_f^2 \sigma_g^2}{B} + \frac{12\gamma\beta C_g^2 L_f^2 \sigma_g^2}{B} \\
& \quad + \frac{48\eta(C_f^2 \sigma_{g'}^2 + C_g^2 \sigma_f^2)}{\gamma(1-\lambda^2)B} + \frac{96\eta(C_f^2 \sigma_{g'}^2 + C_g^2 \sigma_f^2)}{\gamma(1-\lambda^2)^2 B} + \frac{8C_g^2 L_f^2 \sigma_g^2 + 96(1-\lambda)C_g^2 L_f^2 \sigma^2}{\gamma\beta B} \\
& \quad + \left( \frac{18\eta^2 C_g^4 L_f^2}{\gamma^2} + \frac{8\eta^2 \beta C_f^2 L_g^2}{\gamma} + \frac{24\gamma^2 \eta^2 \beta^3 C_g^4 L_f^2}{\gamma} \right) \frac{24(C_f^2 \sigma_{g'}^2 + C_g^2 \sigma_f^2)}{B} \\
& \quad + \left( \frac{18\eta^2 C_g^4 L_f^2}{\gamma^2} + \frac{8\eta^2 \beta C_f^2 L_g^2}{\gamma} + \frac{24\gamma^2 \eta^2 \beta^3 C_g^4 L_f^2}{\gamma} \right) \frac{48(C_f^2 \sigma_{g'}^2 + C_g^2 \sigma_f^2)}{B(1-\lambda^2)} \\
& \leq \frac{2\mathbb{E}[F(x_0) - F(x_*)]}{\eta\beta T} + \frac{6C_g^2 \sigma_f^2 + 6C_f^2 \sigma_{g'}^2 + 3C_g^2 L_f^2 \sigma_g^2}{B} \\
& \quad + \frac{24\eta^2 (C_f^2 \sigma_{g'}^2 + C_g^2 \sigma_f^2)(19C_g^4 L_f^2 + C_f^2 L_g^2)}{\gamma^2 B} + \frac{48\eta^2 (C_f^2 \sigma_{g'}^2 + C_g^2 \sigma_f^2)(19C_g^4 L_f^2 + C_f^2 L_g^2)}{\gamma^2(1-\lambda^2)B} \\
& \quad + \frac{48\eta(C_f^2 \sigma_{g'}^2 + C_g^2 \sigma_f^2)}{\gamma(1-\lambda^2)B} + \frac{96\eta(C_f^2 \sigma_{g'}^2 + C_g^2 \sigma_f^2)}{\gamma(1-\lambda^2)^2 B} + \frac{8C_g^2 L_f^2 \sigma_g^2 + 96(1-\lambda)C_g^2 L_f^2 \sigma^2}{\gamma\beta B},
\end{aligned} \tag{75}$$

where the last inequality holds due to  $\beta \leq \frac{1}{8\gamma}$ .

□
